# Supplementary material for: Technical note: An analytical approach for (U–Th) ∕ He dating of goethite by sample encapsulation in quartz ampoules under vacuum, with an example from the Amerasian Basin, Arctic Ocean
Source: Copernicus journal article supplement (doi:10.5194/gchron-6-653-2024), 2024-12-17
Supplement: Supplementary file 1 [file gchron-6-653-2024-supplement.pdf]

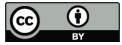

*Supplement of*

**Technical note: An analytical approach for (U–Th) / He dating of goethite by sample encapsulation in quartz ampoules under vacuum, with an example from the Amerasian Basin, Arctic Ocean**

**Olga Valentinovna Yakubovich et al.**

*Correspondence to:* Olga Valentinovna Yakubovich (olya.v.yakubovich@gmail.com)

The copyright of individual parts of the supplement might differ from the article licence.

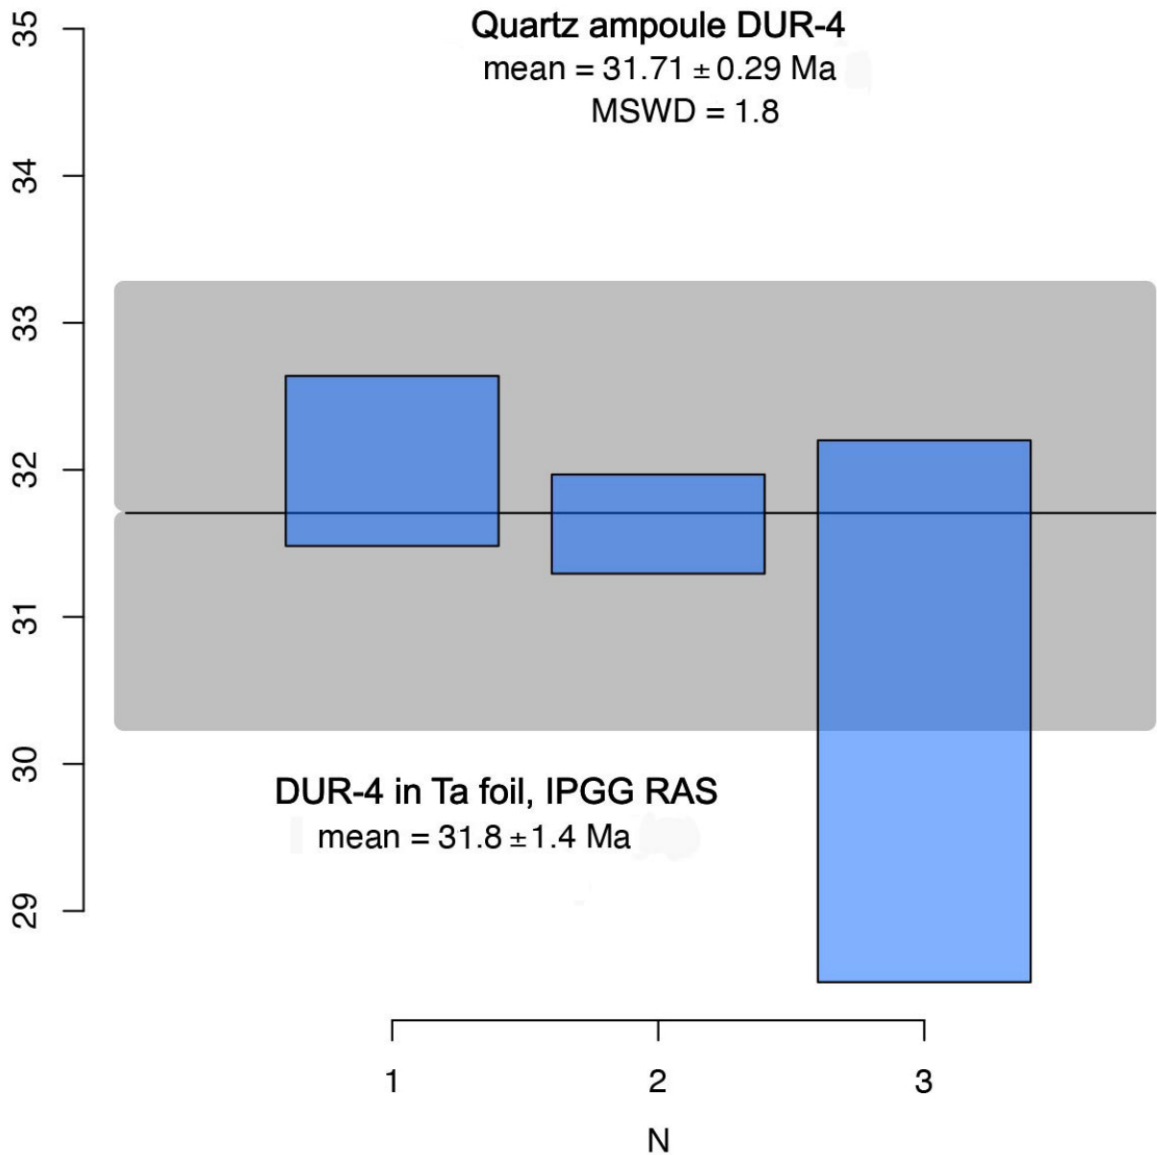

Figure S1. Results of (U-Th)/He dating of Durango apatite. Blue rectangles represent the age values and their uncertainties (1s) obtained for the grains that were sealed in a quartz ampoule. Grey area represents the average (U-Th)/He age of the Durango apatite which was heated in Ta foil and its dispersion (1s).
